# Supplementary material for: The Effect of Solution Casting Temperature and Ultrasound Treatment on PEBAX MH-1657/ZIF-8 Mixed Matrix Membranes Morphology and Performance
Source: MDPI journal article supplement (doi:10.3390/membranes12060584), 2022-05-31
Supplement: s1 [file s1]

Supplementary Information

# The Effect Of Solution Casting Temperature And Ultrasound Treatment On PEBA<sub>X</sub> MH-1657/ZIF-8 Mixed Matrix Membranes Morphology And Performance

Elsa Lasseguette <sup>1</sup>, Louise Fielder-Dunton <sup>1</sup>, Qian Jian<sup>2</sup> and Maria-Chiara Ferrari <sup>1,\*</sup>

<sup>1</sup> School of Engineering, University of Edinburgh, Robert Stevenson Road, Edinburgh EH9 3FB, UK

<sup>2</sup> EaSTCHEM School of Chemistry, University of St Andrews, St Andrews KY16 9ST, UK

\* Correspondence: m.ferrari@ed.ac.uk;

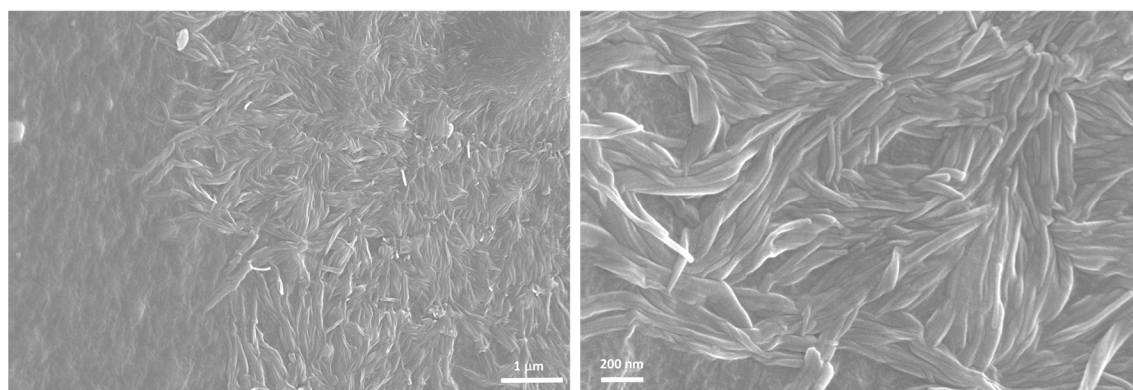

**Figure S1:** High magnification SEM analysis of spherulite formation on neat PEBA<sub>X</sub> membrane cast at 35 °C.

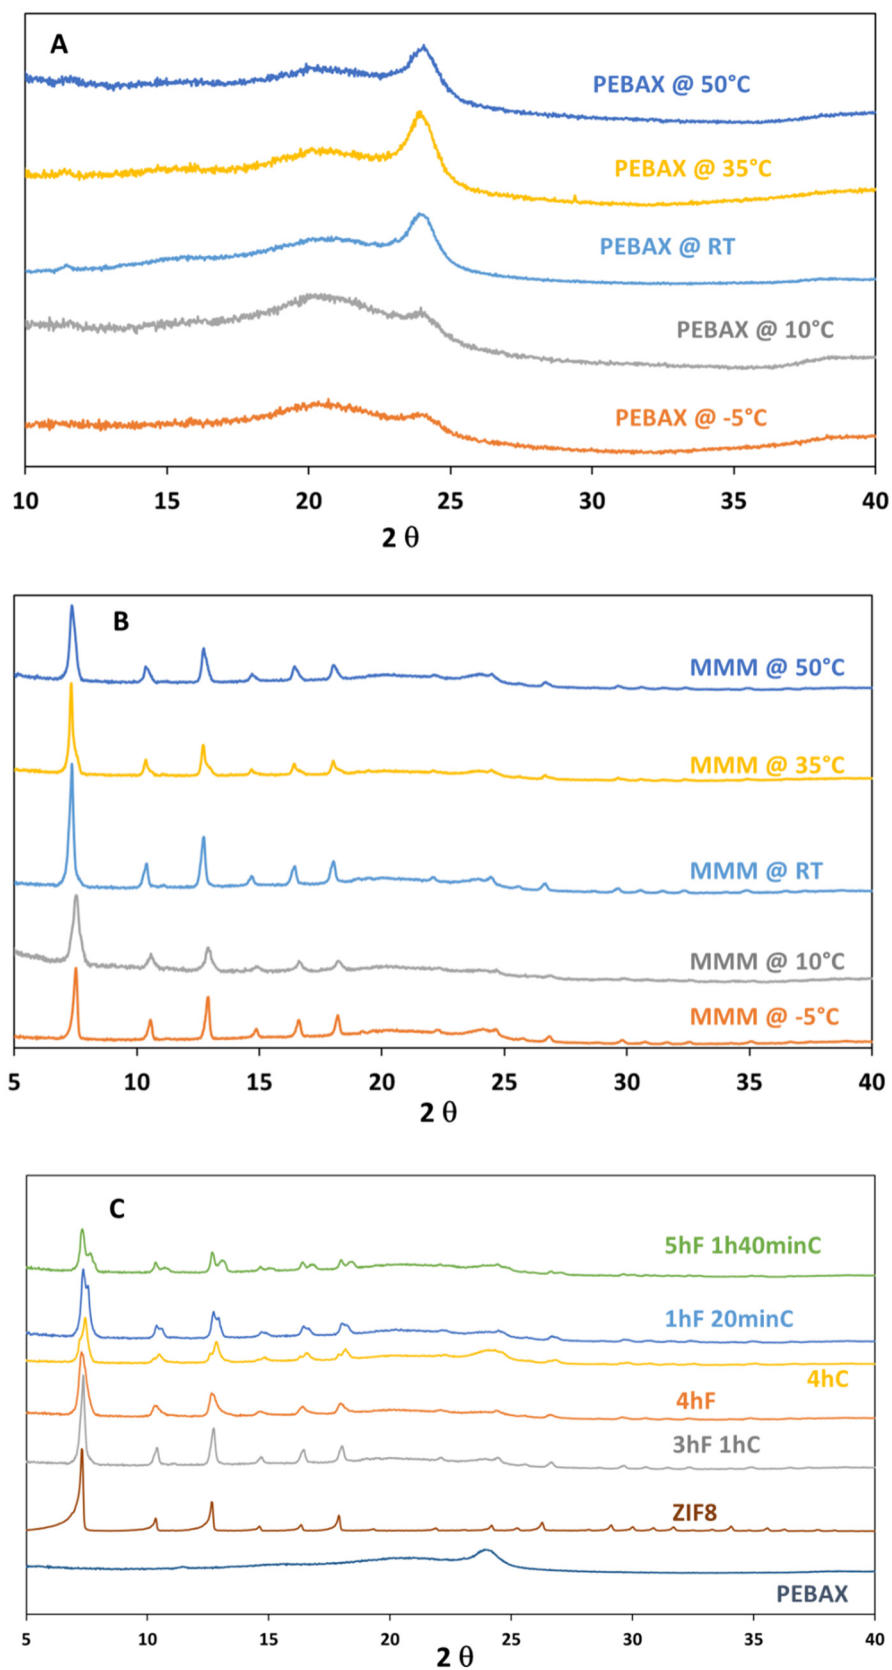

**Figure S2:** XRD patterns according casting plate temperatures (A and B) and ultrasound treatment (C).

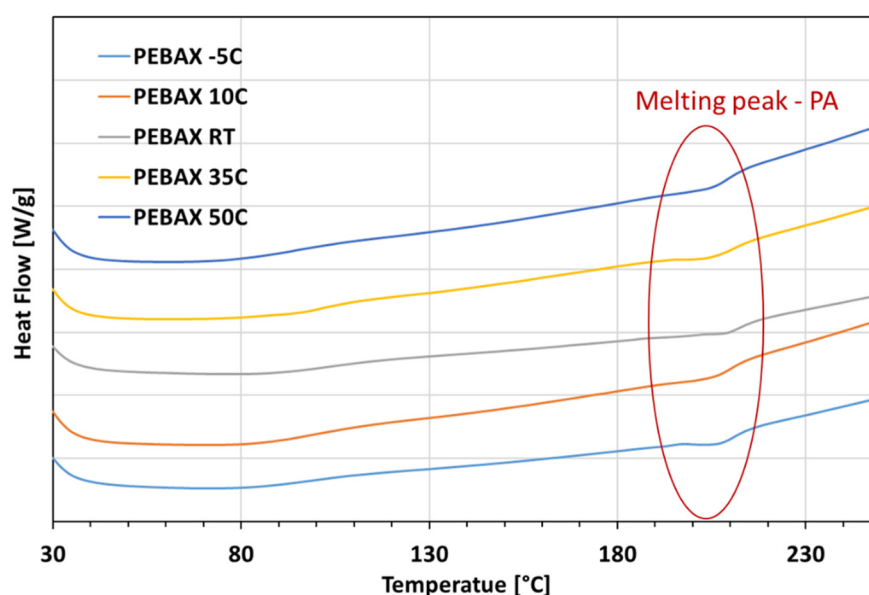

**Figure S3:** Thermograms of PEBAX according casting plate temperatures (*The curves have been shifted vertically for clarity*).

**Table S1:** CO<sub>2</sub> and N<sub>2</sub> permeability, CO<sub>2</sub> diffusivity and CO<sub>2</sub> solubility coefficients for PEBAX and MMMs at different casting temperatures. (*No data for N<sub>2</sub> diffusivity and solubility due to large uncertainty*).

| Membrane        | Permeability N <sub>2</sub><br>[Barrer] | Permeability CO <sub>2</sub><br>[Barrer] | Diffusivity CO <sub>2</sub><br>[10 <sup>-7</sup> cm <sup>2</sup> /s] | Solubility CO <sub>2</sub><br>[10 <sup>-2</sup> cm <sup>3</sup> (STP)/(cm <sup>3</sup> .cmHg)] |
|-----------------|-----------------------------------------|------------------------------------------|----------------------------------------------------------------------|------------------------------------------------------------------------------------------------|
| PEBAX – -5°C    | 6.2 (±1)                                | 62 (±1)                                  | 2.3 (±0.1)                                                           | 2.7 (±0.1)                                                                                     |
| PEBAX – 10°C    | 1.5 (±0.2)                              | 73 (±2)                                  | 2.3 (±0.5)                                                           | 3.2 (±1)                                                                                       |
| PEBAX – 25°C    | 1.1 (±0.5)                              | 49 (±3)                                  | 2.6 (±0.3)                                                           | 1.9 (±0.3)                                                                                     |
| PEBAX – 35°C    | 0.6 (±0.1)                              | 37 (±1)                                  | 2.1 (±0.3)                                                           | 1.7 (±0.2)                                                                                     |
| PEBAX – 50°C    | 0.4 (±0.2)                              | 27 (±1)                                  | 2.8 (±0.9)                                                           | 1 (±0.6)                                                                                       |
| MMM – -5°C      | 2.1 (±1)                                | 66 (±2)                                  | 2.2 (±0.1)                                                           | 3 (±0.1)                                                                                       |
| MMM – 10°C      | 1.1 (±0.1)                              | 75 (±1)                                  | 2.1 (±0.3)                                                           | 3.5 (±0.2)                                                                                     |
| MMM – 25°C      | 1.4 (±0.1)                              | 72 (±1)                                  | 1.9 (±0.3)                                                           | 3.8 (±0.7)                                                                                     |
| MMM – 35°C      | 1 (±0.3)                                | 74 (±1)                                  | 2.2 (±0.1)                                                           | 3.8 (±0.6)                                                                                     |
| MMM – 50°C      | 1.4 (±0.2)                              | 84 (±1)                                  | 2.3 (±0.3)                                                           | 3.6 (±0.4)                                                                                     |
| MMM – 1hF20minC | 0.8 (±0.3)                              | 74 (±1)                                  | -                                                                    | -                                                                                              |
| MMM – 4hF       | 0.8 (±0.4)                              | 35 (±1)                                  | -                                                                    | -                                                                                              |
| MMM – 4hC       | 1.1 (±0.5)                              | 80 (±1)                                  | -                                                                    | -                                                                                              |
| MMM – 5hF1h40C  | 0.7 (±0.3)                              | 65 (±2)                                  | -                                                                    | -                                                                                              |

Maxwell Equation:

$$P_{MMM} = P_P \left[ \frac{P_{Filler} + 2P_P + 2\Phi_{Filler}(P_{Filler} - P_P)}{P_{Filler} + 2P_P + \Phi_{Filler}(P_{Filler} - P_P)} \right] \quad (S1)$$

where  $P_{MMM}$  is the gas permeability of the Mixed Matrix Membrane,  $P_P$  is the gas permeability of the polymer matrix (PEBAX),  $P_{Filler}$  is the gas permeability of the filler (ZIF-8),  $\Phi_{Filler}$  is the volume fraction of the filler inside the MMM.
